# Supplementary material for: Chiral (salen)Coiii catalyst for the synthesis of cyclic carbonatesElectronic supplementary information (ESI) available: general experimental procedures and analytical data for new compounds. See http://www.rsc.org/suppdata/cc/b4/b401543f/
Source: Royal Society of Chemistry journal article supplement (doi:10.1039/b401543f), 2004-01-01
Supplement: b401543f.doc [file b401543f.doc]

# **[**Supporting Information for *Chem. Commun*. manuscript # B401543F]

# Chiral (salen)CoIII catalyst for the synthesis of cyclic carbonates

Robert L. Paddock and SonBinh T. Nguyen*

Department of Chemistry and Institute for Environmental Catalysis

Northwestern University, 2145 Sheridan Road, Evanston, IL 60208-3113

**General information.** NMR spectra were recorded on a Mercury 400 (400.178 MHz for 1H, 100 MHz for 13C) spectrometer. NMR data are reported as follows: chemical shift (multiplicity (b = broad, s = singlet, d = doublet, dd = doublet of doublets, t = triplet, q = quartet, and m = multiplet), and integration). 1H and 13C chemical shifts are reported in ppm downfield from tetramethylsilane (TMS,  scale) with the solvent resonances as internal standards. Chiral GC analysis of the propylene carbonate product was carried out on a Hewlett-Packard 6890 gas chromatograph equipped with FID detector and HP ChemStation software. The chiral column used was a 30-m Supelco -Dex 225 fused silica capillary column with 0.25-mm inner diameter and 0.25-m film thickness, flow rate = 1.8 mL/min, head pressure= 20 psi. Temp Program: initial temperature = 130oC, rate = 10 oC/min; final time = 10 min, final temperature = 175oC. Retention time of (*R*) and (*S*)-4-Methyl-1,3-dioxolan-2-one was 10.9 min and 12.4 min, respectively.

**Materials.** Dichloromethane (Fisher) and propylene oxide (Aldrich Chemical Co.) were distilled over calcium hydride under nitrogen and stored under nitrogen in Strauss flask prior to use. (*R*)-(+)-4-dimethylaminopyrindinyl(pentaphenylcyclopentadienyl) iron (DMAP*) was purchased from Strem Chemicals and handled in a drybox. *N*,*N*-4-dimethylaminoquinoline (DMAQ)1 and *N*,*N*-9-dimethylaminoacridine2 were synthesized according to known literature procedures. All other reagents were purchased from the Aldrich Chemical Co. and used without further purification, unless otherwise noted.

**Representative procedure for the reaction of propylene oxide and CO2**. On the bench top, a 125-mL stainless steel Parr high pressure reactor was charged with CoIII(salen) (21.3 mg, 3.33 x 10-5 mol), propylene oxide (3.5 mL, 2.91 g, 5.00 x 10-2 mol), DMAP (8.1 mg, 6.63 x 10-5 mol), and CH2Cl2 (0.5 mL). The reaction vessel was placed under a constant pressure of 300 psig of CO2 for 5 min and then heated to 100 oC for the allotted time. The vessel was then cooled to ambient temperature by placement in an ice water bath. The pressure was then released and an aliquot of the crude reaction mixture was taken for analysis by 1H NMR spectroscopy. The bomb contents were then transferred to a 50-mL round-bottom flask. Unreacted substrate and solvent were removed *in vacuo* affording crude propylene carbonate which could be further purified via Kugelrohr distillation (65 oC/0.2 mm).

At lower temperatures when a mixture of polymer and cyclic carbonate were formed, the crude product was heated at 55 oC under mild vacuum on a rotary evaporator for an extended period of time (up to one hour) to allow for degradation of the polymer to the cyclic carbonate.

Cyclic carbonate products in Table 2 were confirmed by comparing their NMR data with values reported in the literature. Data was available for 4-methyl-1,3-dioxolan-2-one,3 4-chloromethyl-1,3-dioxolan-2-one,3 4-phenyl-1,3-dioxolan-2-one,3 4,4-dimethyl-1,3-dioxolan-2-one,4 *trans*-4,5-dimethyl-1,3-dioxolan-2-one.5

Analytical data for the following compounds were obtained by us.

**4-Butyl-1,3-dioxolan-2-one.** 1H NMR (CD2Cl2):  0.92 (t, 3H, C*H3*), 1.37 (m, 4H, C*H2*), 1.69 (m, 1H, C*H2*), 1.78 (m, 1H, C*H2*), 4.05 (t, 1H, C*H2*O), 4.50 (t, 1H, C*H2*O), 4.70 (m, 1H, C*H*O). 13C NMR (CD2Cl2):  14.12, 22.81, 27.00, 34.00, 70.02, 77.70, 155.55. HRCIMS: m/z Calcd. for C7H13O3: 145.0859 ([MH]+). Found: 145.0858.

**4-Benzyl-1,3-dioxolan-2-one.** 1H NMR (CD2Cl2):  2.97-3.13 (dd, 2H, benzylic protons, A and B of ABX system, *J*AB = 14.5 Hz, *J*AX = *J*BX = 7 Hz), 4.15 (t, 1H, C*H2*O), 4.44 (t, 1H, C*H2*O), 4.92 (m, 1H, C*H*O), 7.23 (m, 2H, aromatic-*H*), 7.29 (m, 1H, aromatic-*H*), 7.34 (m, 2H, aromatic-*H*). 13C NMR (CD2Cl2):  40.07, 69.16, 77.50, 127.93, 129.39, 129.90, 134.94, 155.22. HREIMS: m/z Calcd. for C10H10O3: 178.0624 ([M]+). Found: 178.0623.

**References:**

(1) McCurdy, A.; Jimenez, L.; Stauffer, D. A.; Dougherty, D. A. *J. Am. Chem. Soc.* **1992**, *114*, 10314-10321.

(2) Albert, A. *The Acridines: Their Preparation, Physical, Chemical, and Biological Properties and Uses*,2nd ed., St. Martin's Press; New York; **1966**; 604 pp .

(3) Katzhend, J.; Sarel, S.; Ringel, I. *J. Chem. Soc., Perkin Trans. 2* **1972**, *14*, 2019-2025.

(4) Baba, A.; Nozaki, T.; Matsuda, H. *Bull. Chem. Soc. Jpn* **1987**, *60*, 1552-1554.

(5) Iida, T.; Itaya, T. *Tetrahedron* **1993**, *49*, 10511-10530.
